# Supplementary material for: Seedless growth of ZnO nanorods on TiO2 fibers by chemical bath deposition
Source: Royal Society of Chemistry journal article supplement (doi:10.1039/c5ce01866h), 2016-01-01
Supplement: c5ce01866h1.pdf [file c5ce01866h1.pdf]

**Electronic Supplementary Information:**

**Seedless growth of ZnO nanorods on TiO<sub>2</sub> fibers by chemical bath  
deposition**

*Benxue Liu, Cong Feng, Xingshuang Zhang, Luyi Zhu\*, Xinqiang Wang, Guanghui Zhang, Dong*

*Xu\**

State Key Laboratory of Crystal Materials and Institute of Crystal Materials, Shandong University,

Jinan 250100, PR China

### Synthesis of organotitanium compound

Typically, DI water (20.94 g), Hacac (38.80 g), TEA (156.84 g) were added into  $TiCl_4$  (73.50 g) under ice-water bath in turn. Before reaction, all reactants were diluted by methanol that 200 ml, 100 ml, 112 ml, and 202 ml methanol solution were added respectively. A gold solution was obtained after mixing these species. The mixture was evaporated into dry powders using vacuum evaporator under a condition of -0.1 mbr, 50 °C. The powders were resolved by THF (800 ml), and the unresolved component was filtrated. Aurantia powders (65.05 g, yield 85 %) which could be used as precursor to force-spinning were acquired after evaporating the THF solution. The main chemical reaction could be simplified as the following equation.

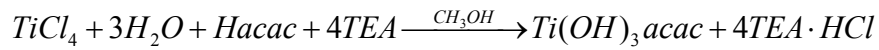

Table S1. Parameters of force-spinning process

|                   |            |
|-------------------|------------|
| Temperature       | 32 °C      |
| Relative Humidity | 42 %       |
| Rotating speed    | 23000 rpm  |
| Viscosity         | 88.85 Pa•s |

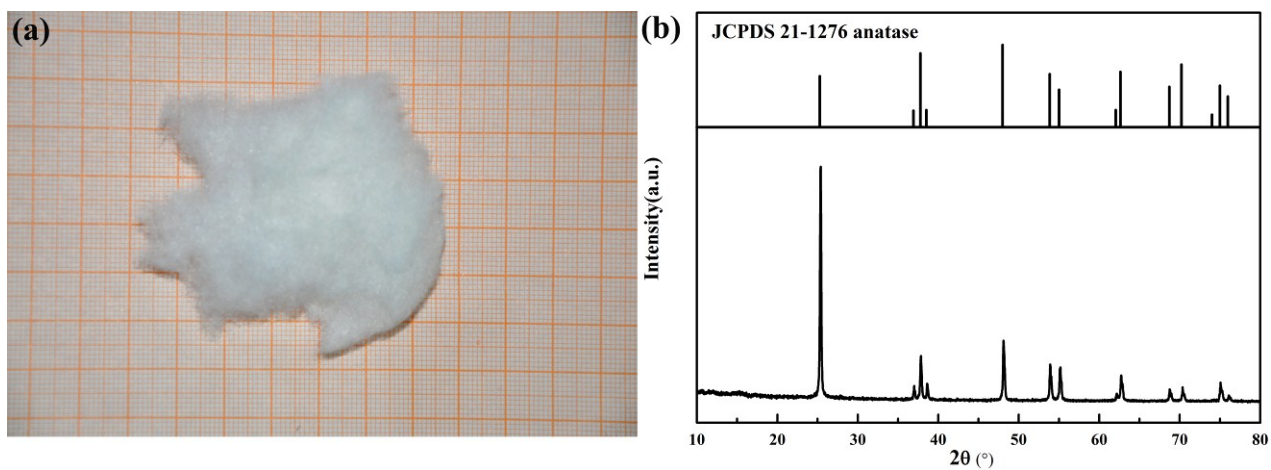

Fig. S1. (a) Photo image and (b) XRD pattern of TiO<sub>2</sub> fibers heat-treated at 500 °C

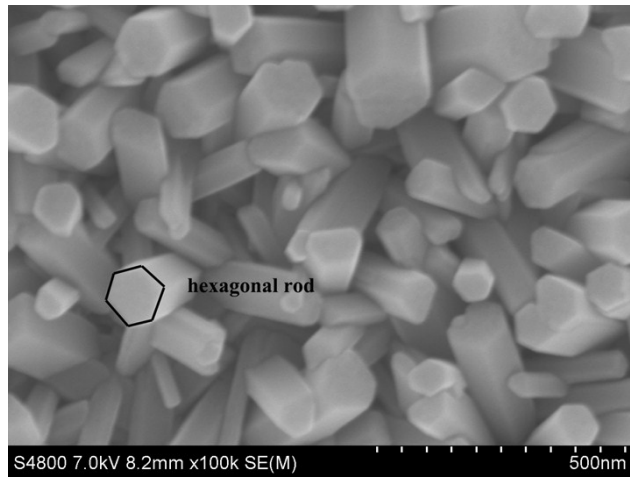

Fig. S2. Magnified SEM image of ZnO NRs anchored on TiO<sub>2</sub> fibers

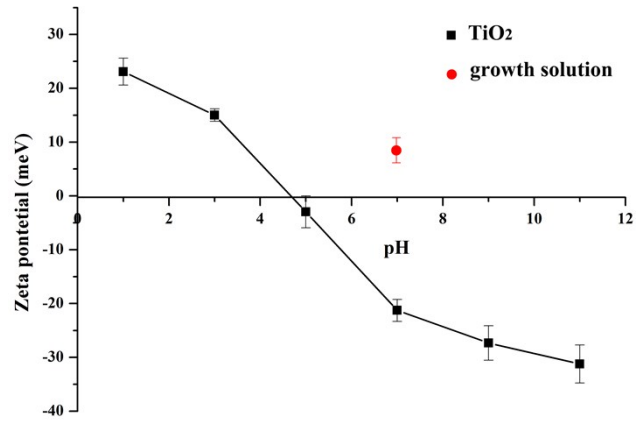

Fig. S3. Zeta potential of ZnO growth solution and TiO<sub>2</sub> fiber aqueous solution at various pH value

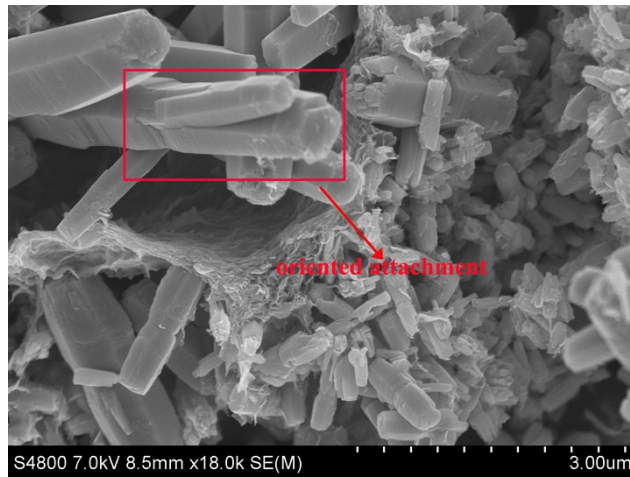

Fig. S4. Oriented attachment growth found in the ZnO NRs homogeneously grown in growth solution
